# Supplementary material for: Epigenetic Modifications Unlock the Milk Protein Gene Loci during Mouse Mammary Gland Development and Differentiation
Source: PubMed Central journal article supplement (PMC3534698; doi:10.1371/journal.pone.0053270), 2013-01-02

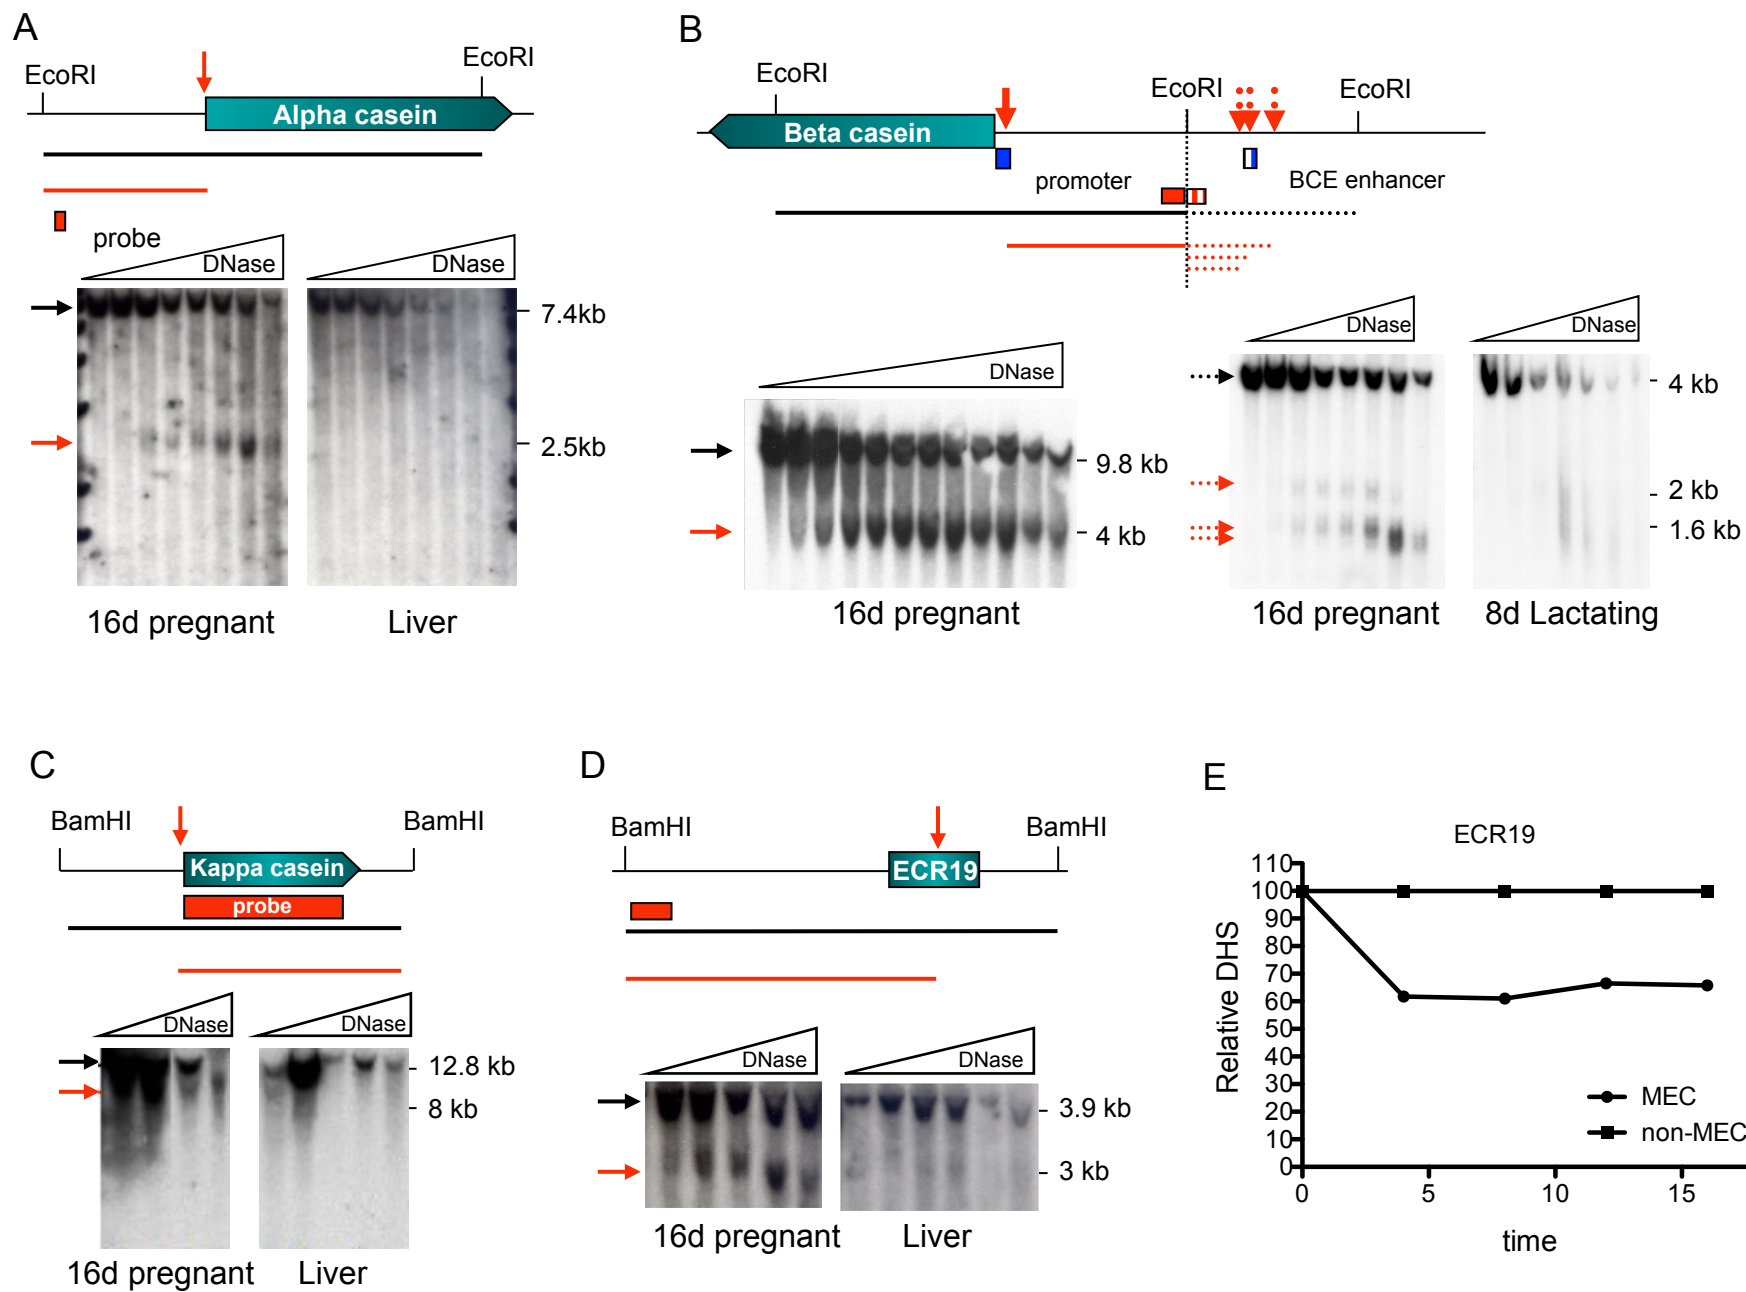

Supplement: pone.0053270.s004.pdf [file pone.0053270.s004.pdf]
