# Supplementary material for: Epigenetic Modifications Unlock the Milk Protein Gene Loci during Mouse Mammary Gland Development and Differentiation
Source: PubMed Central journal article supplement (PMC3534698; doi:10.1371/journal.pone.0053270), 2013-01-02

(A)

|                   | <b>H3K4Me2</b>                           | <b>Control</b>                           |
|-------------------|------------------------------------------|------------------------------------------|
| <b>Experiment</b> | <b>Uniquely Mapped<br/>(Total Reads)</b> | <b>Uniquely Mapped<br/>(Total Reads)</b> |
| <b>Lvr_K4Me2</b>  | 26442543                                 | 8516817                                  |
| <b>Mg_K4Me2</b>   | 26137478                                 | 7930019                                  |
| <b>Mec_K4Me2</b>  | 11741328                                 | 8665639                                  |

(B)

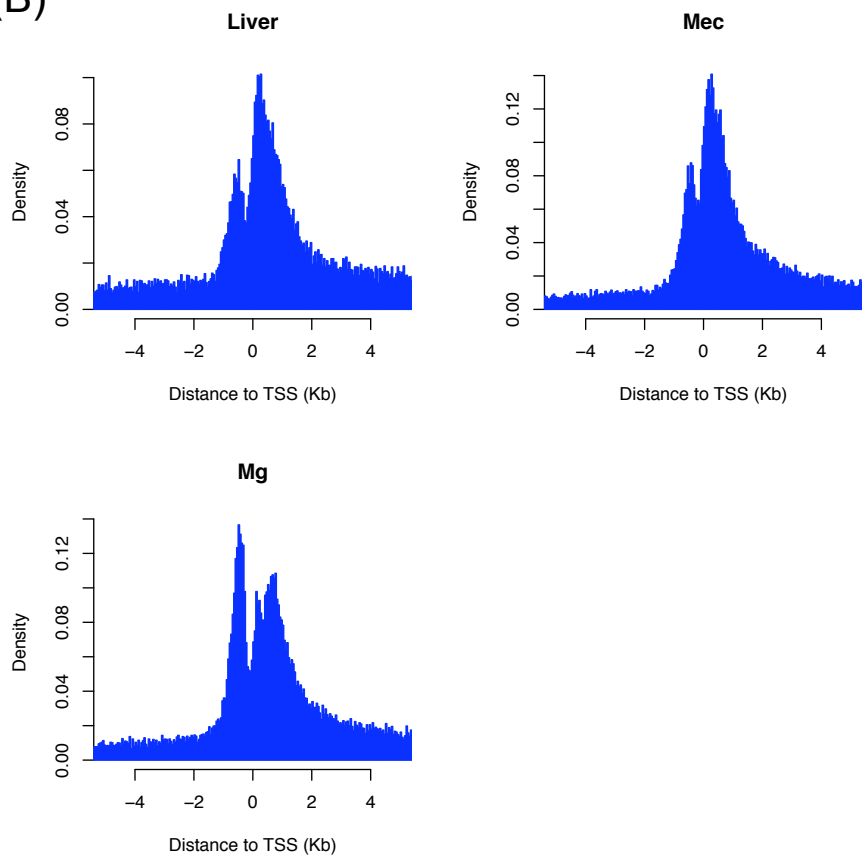

(C)

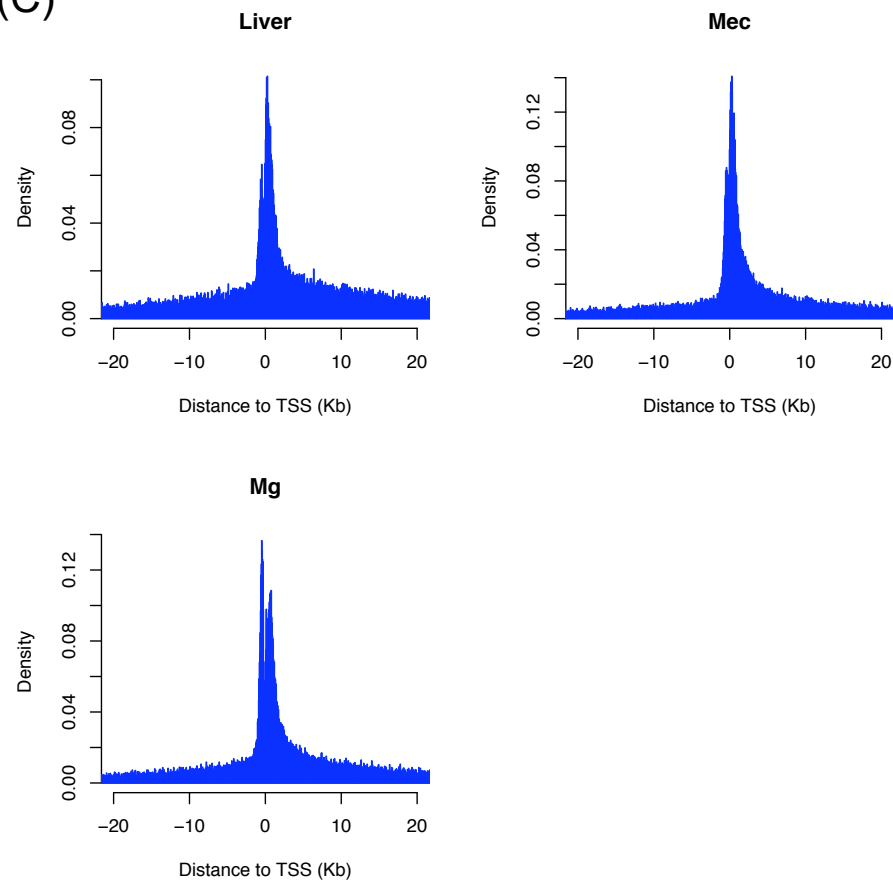

Supplement: pone.0053270.s007.pdf [file pone.0053270.s007.pdf]
